# Supplementary material for: Real-time measurements of gas-phase organic acids using SF 6 − chemical ionization mass spectrometry
Source: Copernicus journal article supplement (doi:10.5194/amt-2018-46), 2018-02-19
Supplement: Supplementary file 1 [file amt-2018-46-supplement.pdf]

1 **Supplementary Information:**

2 **Real-time measurements of gas-phase organic acids using SF<sub>6</sub><sup>-</sup> chemical ionization**  
3 **mass spectrometry**

4

5 Theodora Nah,<sup>1</sup> Yi Ji,<sup>1,2</sup> David J. Tanner,<sup>1</sup> Hongyu Guo,<sup>1</sup> Amy P. Sullivan,<sup>3</sup> Nga Lee  
6 Ng,<sup>1,2</sup> Rodney J. Weber<sup>1</sup> and L. Gregory Huey<sup>1\*</sup>

7

8 <sup>1</sup>*School of Earth and Atmospheric Sciences, Georgia Institute of Technology, Atlanta, GA, USA*

9 <sup>2</sup>*School of Chemical and Biomolecular Engineering, Georgia Institute of Technology, Atlanta, GA, USA*

10 <sup>3</sup>*Department of Atmospheric Science, Colorado State University, Fort Collins, CO, USA*

11

12 \* *To whom correspondence should be addressed: greg.huey@eas.gatech.edu*

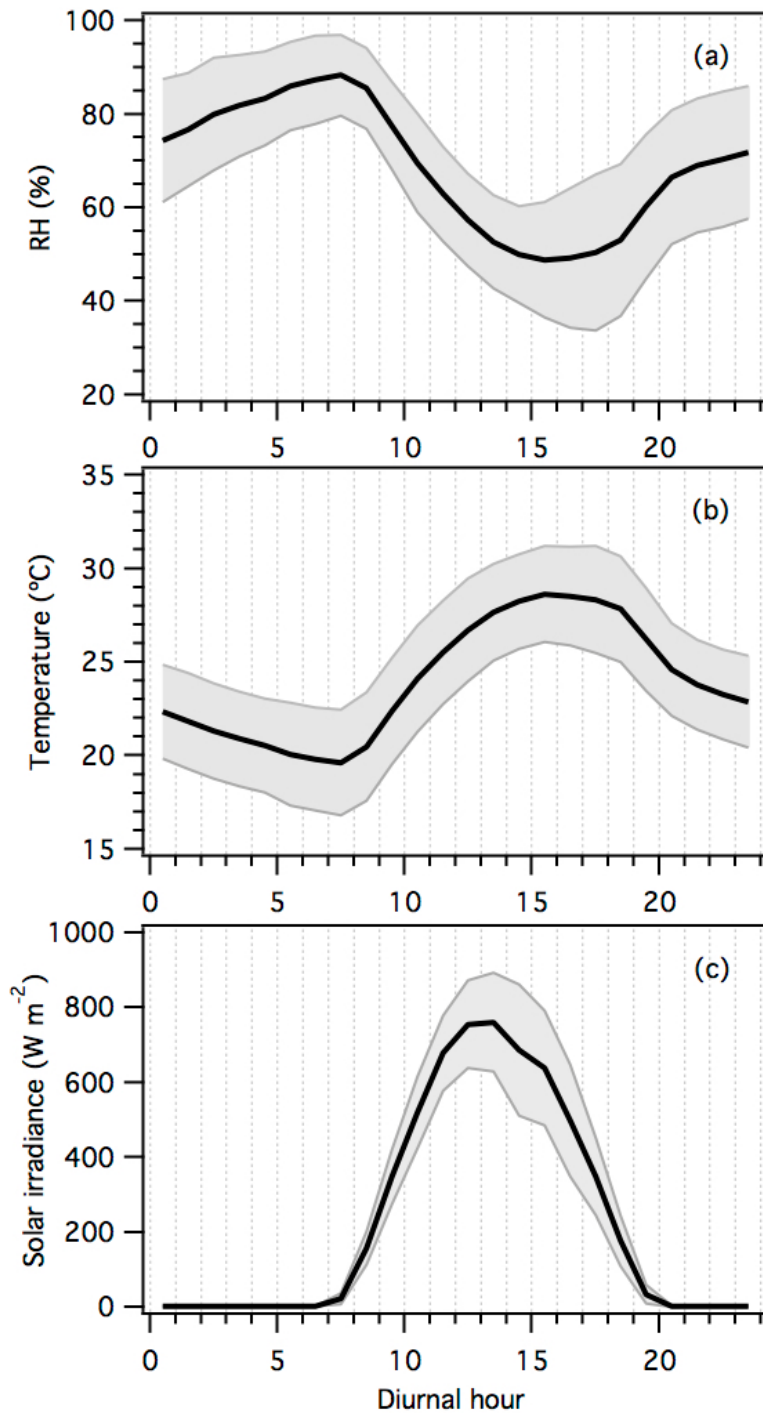

13

14 **Figure S1:** Diurnal trends of (a) relative humidity, (b) temperature, and (c) solar  
 15 radiance. The lines within the shaded area represents the average values. The upper and  
 16 lower boundaries of the shaded areas mark one standard deviation.

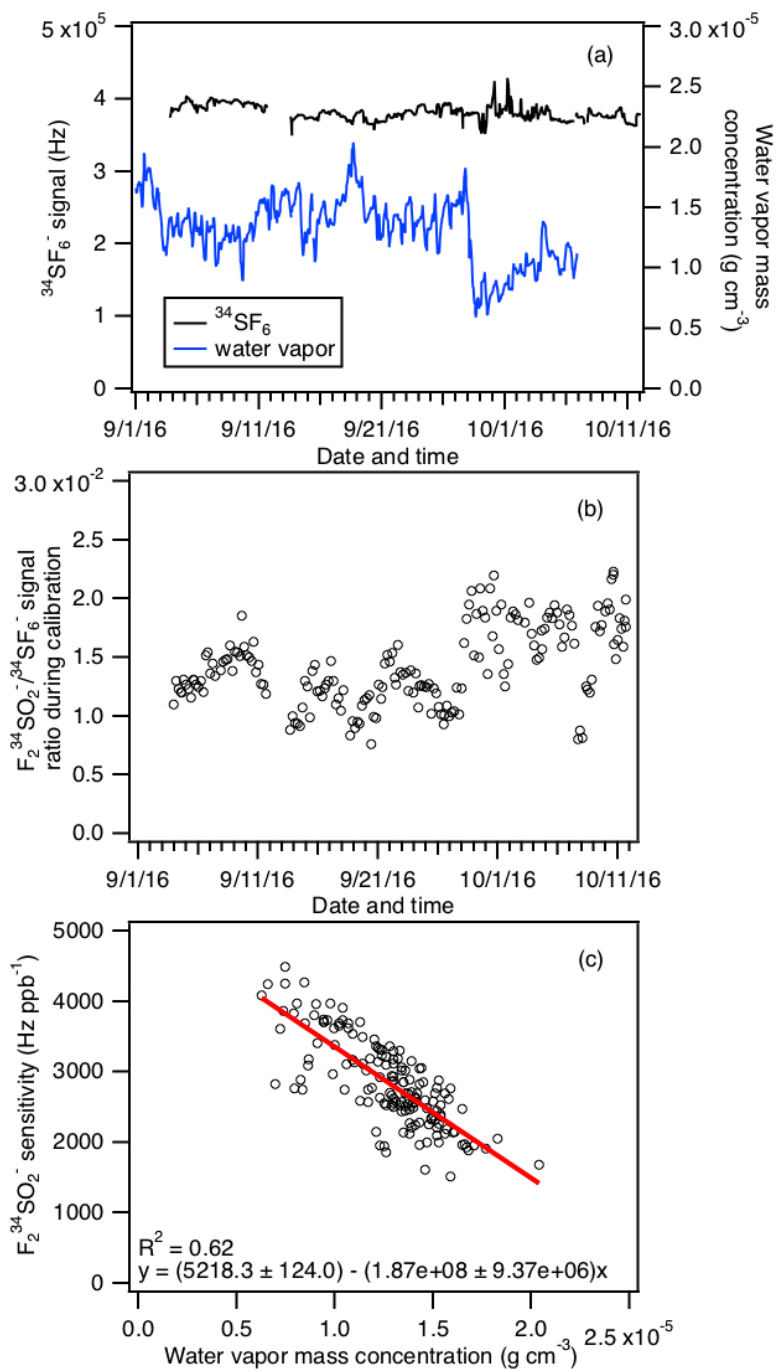

17

18 **Figure S2:** (a) Time series of  $^{34}\text{SF}_6^-$  reagent ion signal and ambient water vapor  
 19 concentration for the entire field study. The ambient water vapor mass concentrations are  
 20 determined from ambient relative humidities and temperatures. (b) Time series of  
 21  $\text{F}_2^{34}\text{SO}_2^- / ^{34}\text{SF}_6^-$  ion signal ratio obtained during calibration measurements. (c)  $\text{F}_2^{34}\text{SO}_2^-$   
 22 ion sensitivity obtained from calibration measurements as a function of ambient water  
 23 vapor concentration. Data in panels (a) to (c) are displayed as 1-hour averages.

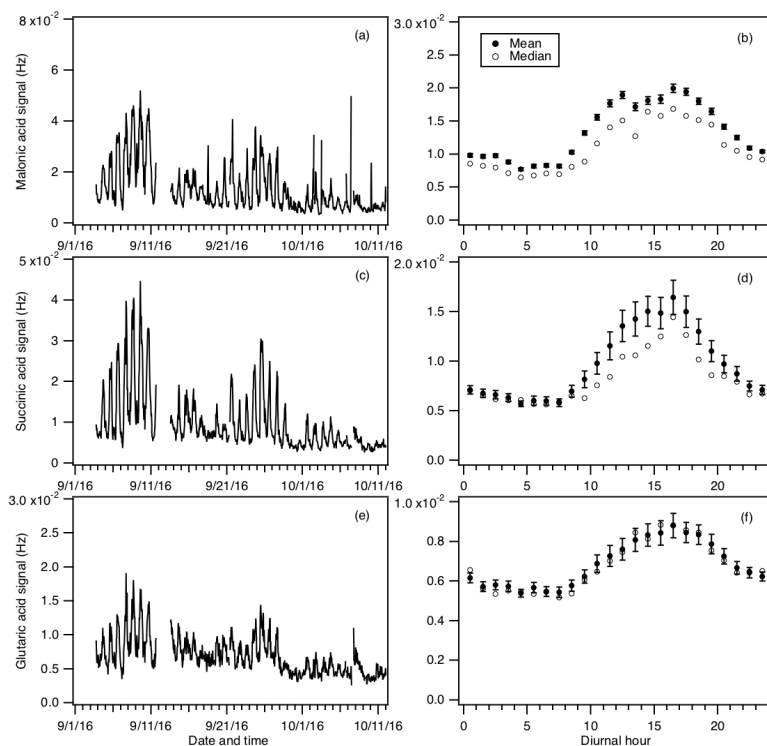

24

25 **Figure S3:** Time series of signals of (a) malonic, (c) succinic, and (e) glutaric acids  
 26 measured during the field study. The data are displayed as 1-hour averages. Their  
 27 corresponding diurnal profiles are shown in (b), (d) and (f), respectively. All the signals  
 28 represent averages in 1-hour intervals and the standard errors are plotted as error bars.  
 29 These organic acids were not calibrated so all the signals are presented here as Hz  
 30 normalized by the instrument's sensitivity to  $F_2^{34}SO_2$ , which was the primary calibrant  
 31 used in the field study.

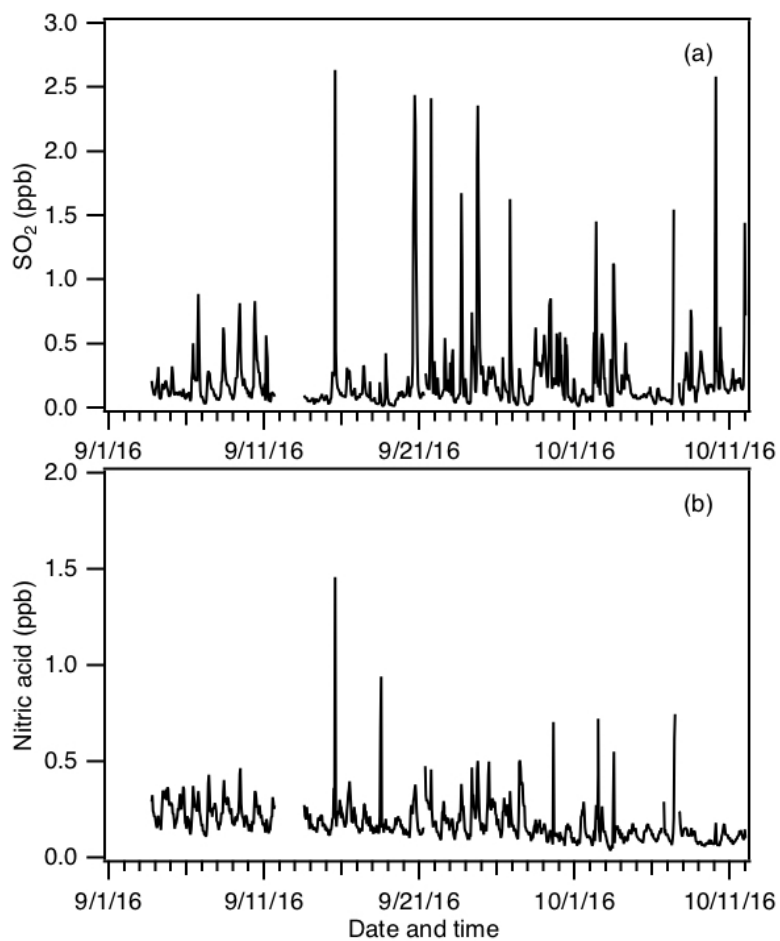

32

33 **Figure S4:** Time series of (a) SO<sub>2</sub> and (b) HNO<sub>3</sub> concentrations measured during the  
34 field study. All the data are displayed as 1-hour averages.

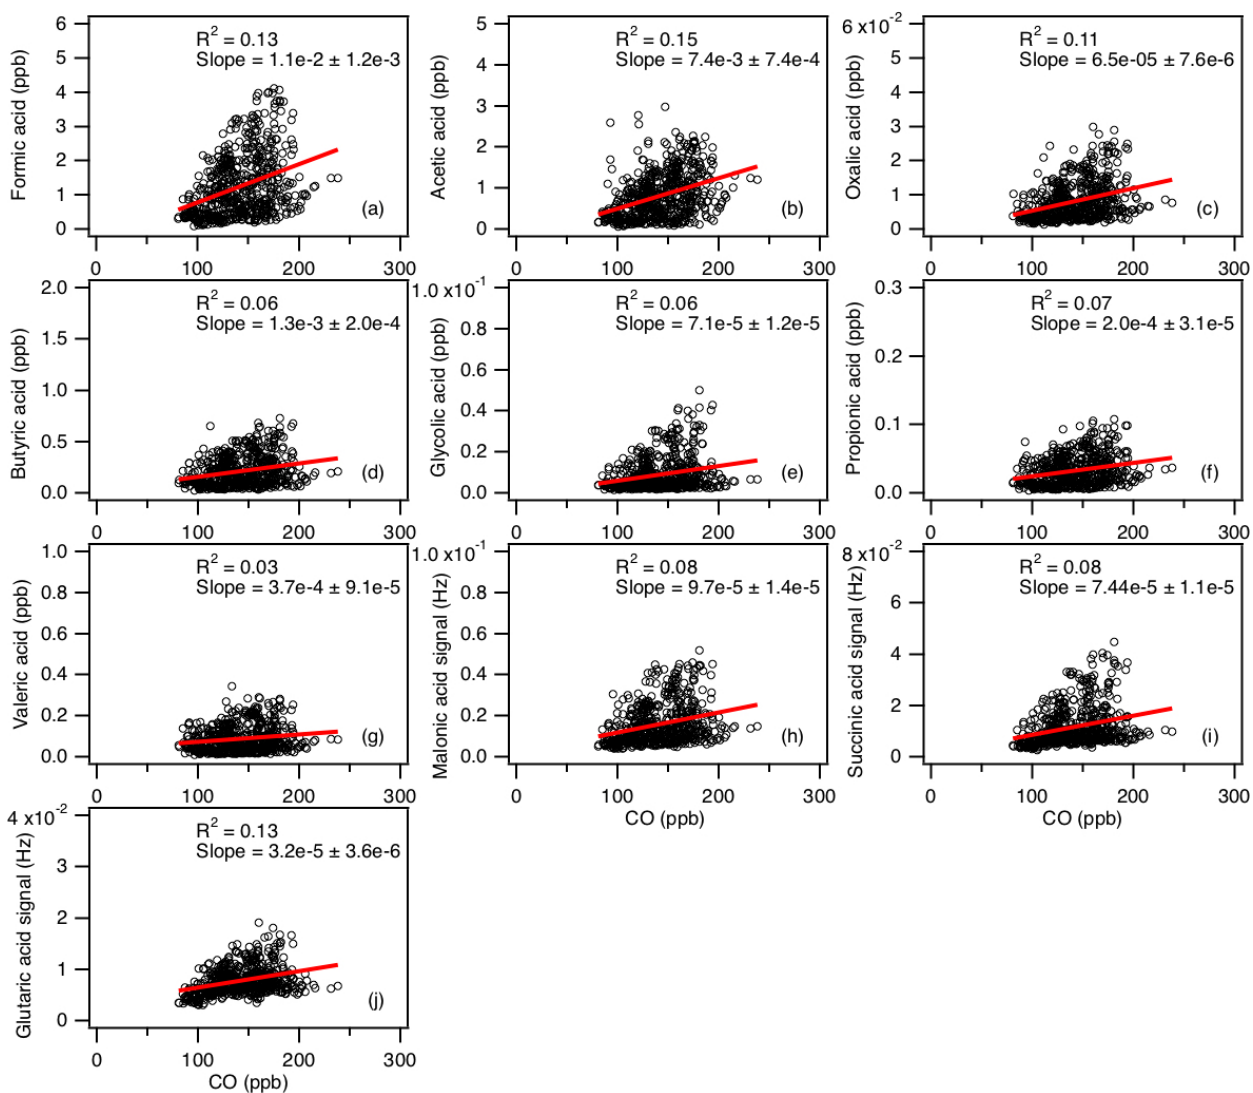

35

36 **Figure S5:** Scatter plots of concentrations (or signals) of (a) formic, (b) acetic, (c) oxalic,  
 37 (d) butyric, (e) glycolic, (f) propionic, (g) valeric, (h) malonic, (i) succinic, and (j)  
 38 glutaric acids with CO concentration. All the data are displayed as 1-hour averages. The  
 39 data for malonic, succinic and glutaric acids are presented as Hz normalized by the  
 40 instrument's sensitivity to  $F_2^{34}SO_2$  since these organic acids were not calibrated. Red  
 41 lines shown are linear fits to the data.

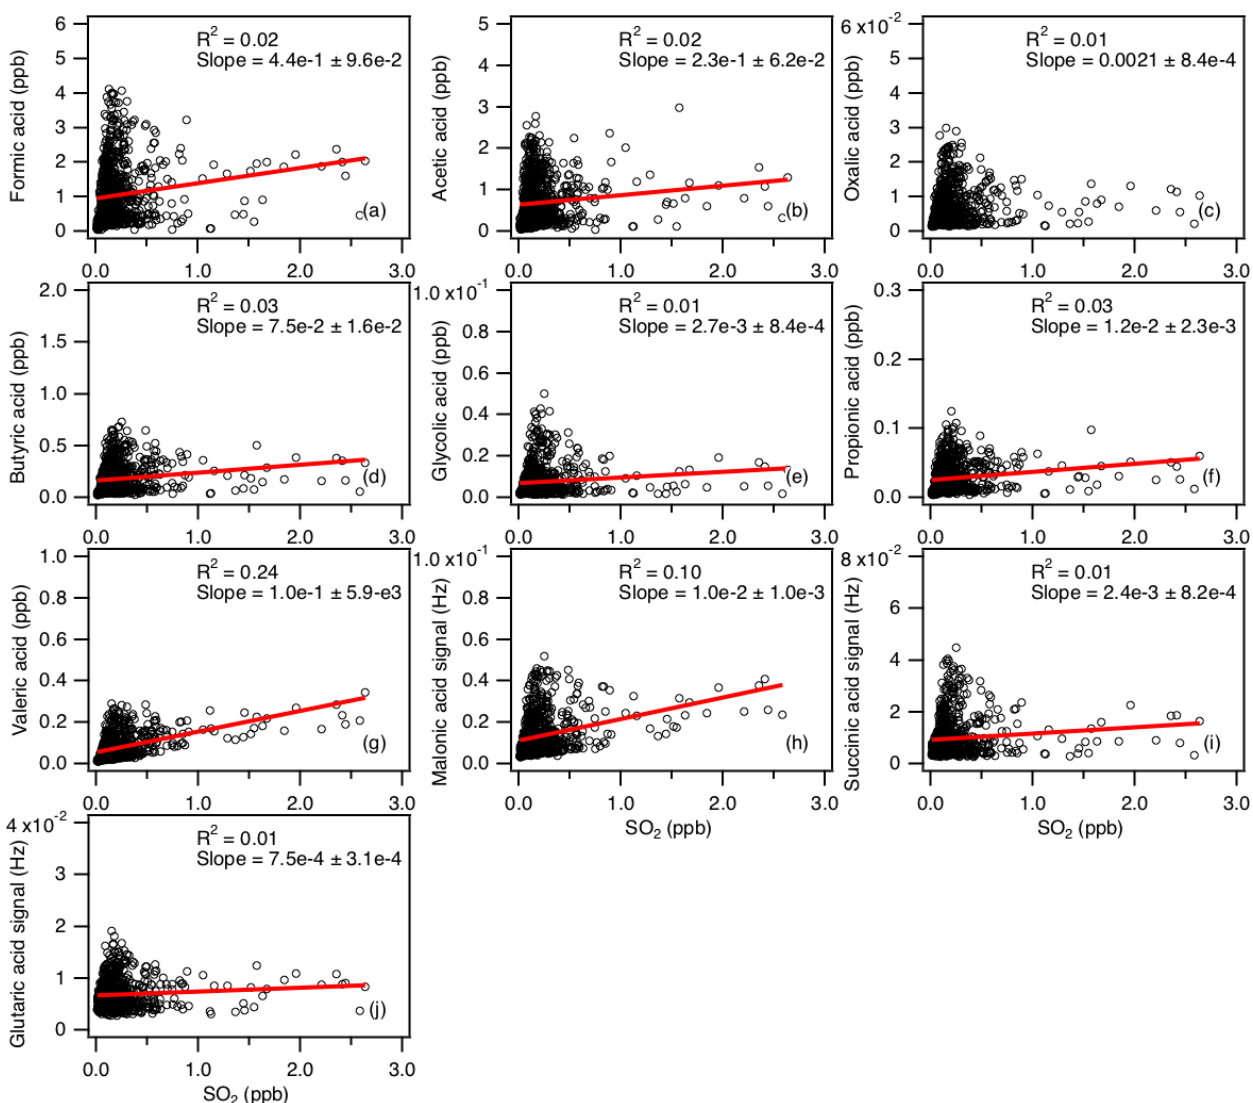

42

43 **Figure S6:** Scatter plots of concentrations (or signals) of (a) formic, (b) acetic, (c) oxalic,  
 44 (d) butyric, (e) glycolic, (f) propionic, (g) valeric, (h) malonic, (i) succinic, and (j)  
 45 glutaric acids with SO<sub>2</sub> concentration. All the data are displayed as 1-hour averages. The  
 46 data for malonic, succinic and glutaric acids are presented as Hz normalized by the  
 47 instrument's sensitivity to F<sub>2</sub><sup>34</sup>SO<sub>2</sub> since these organic acids were not calibrated. Red  
 48 lines shown are linear fits to the data.

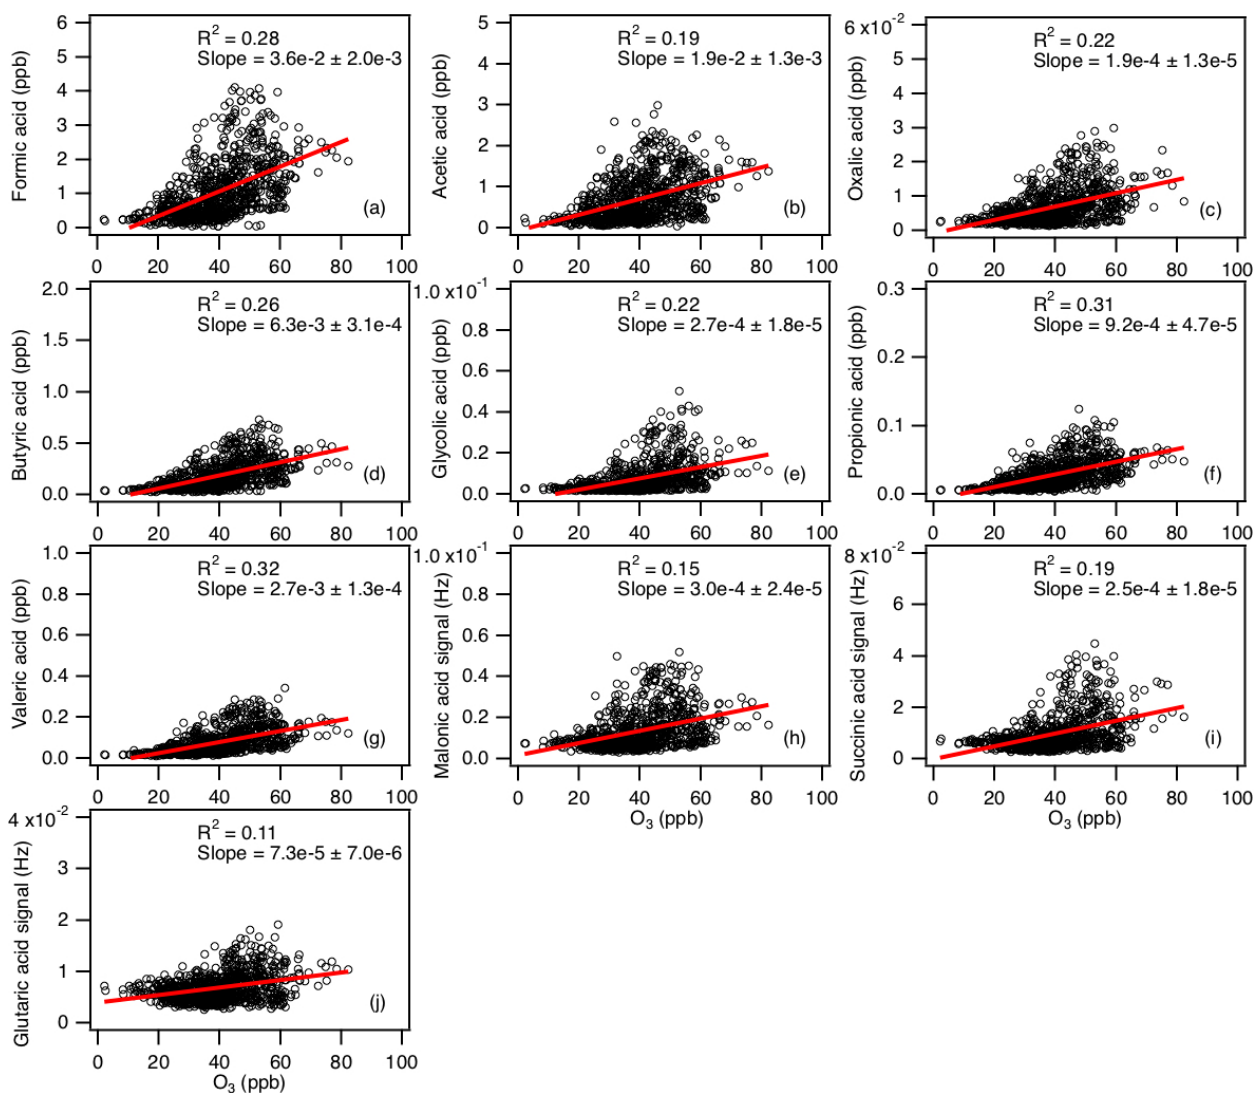

49

50 **Figure S7:** Scatter plots of concentrations (or signals) of (a) formic, (b) acetic, (c) oxalic,  
 51 (d) butyric, (e) glycolic, (f) propionic, (g) valeric, (h) malonic, (i) succinic, and (j)  
 52 glutaric acids with O<sub>3</sub> concentration. All the data are displayed as 1-hour averages. The  
 53 data for malonic, succinic and glutaric acids are presented as Hz normalized by the  
 54 instrument's sensitivity to F<sub>2</sub><sup>34</sup>SO<sub>2</sub> since these organic acids were not calibrated. Red  
 55 lines shown are linear fits to the data.



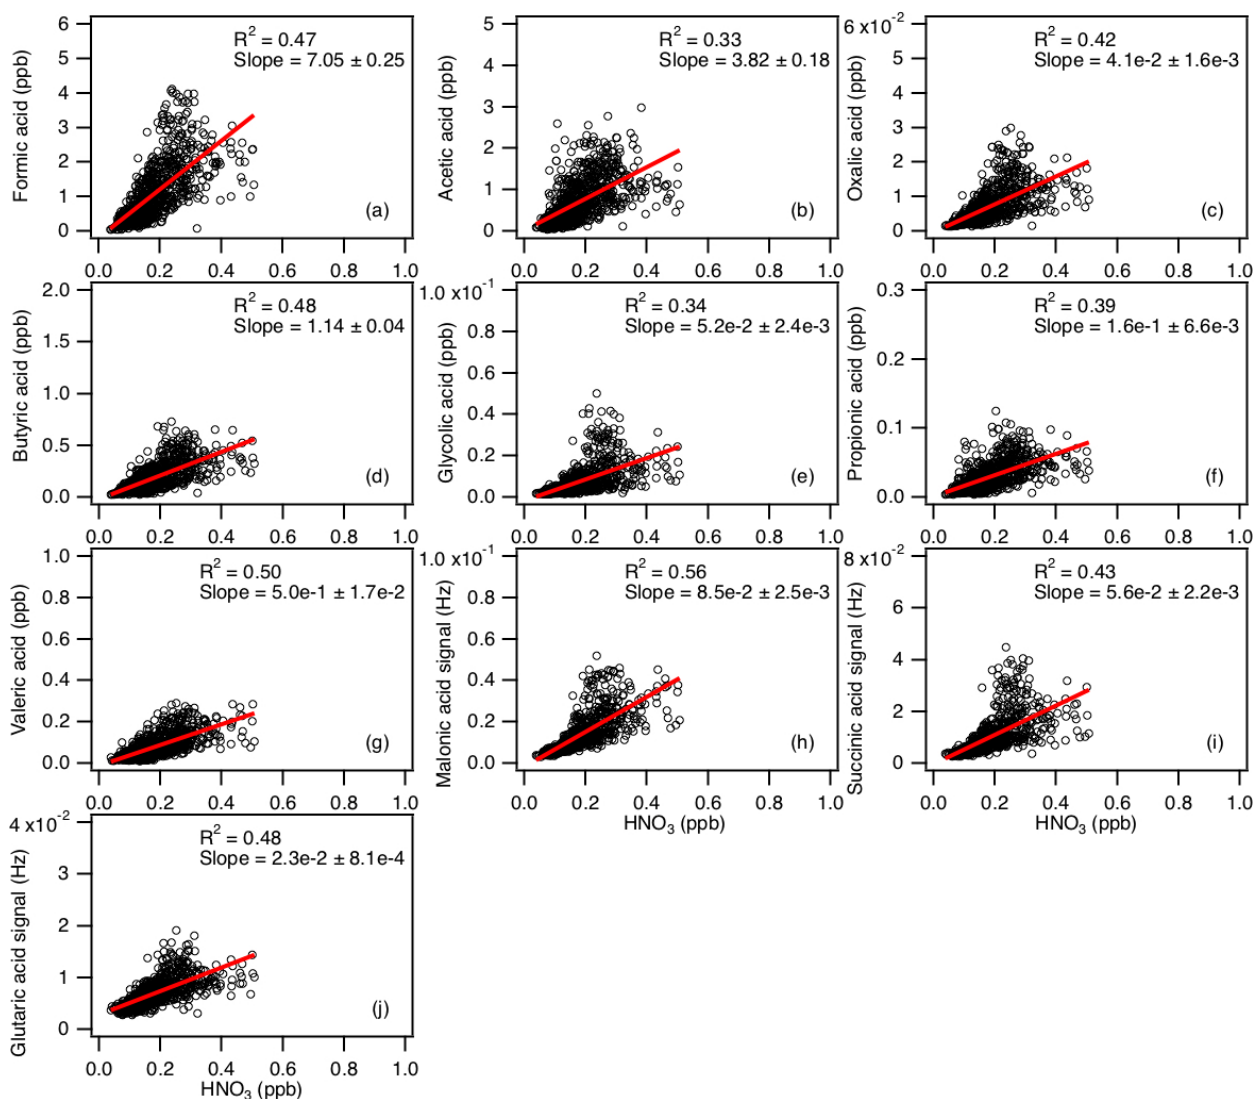

56

57 **Figure S8:** Scatter plots of concentrations (or signals) of (a) formic, (b) acetic, (c) oxalic,  
 58 (d) butyric, (e) glycolic, (f) propionic, (g) valeric, (h) malonic, (i) succinic, and (j)  
 59 glutaric acids with  $\text{HNO}_3$  concentration. To exclude periods when the site was affected  
 60 by urban or power plant emissions, data where  $\text{HNO}_3 > 0.5$  ppb are excluded from these  
 61 scatter plots. All the data are displayed as 1-hour averages. The data for malonic, succinic  
 62 and glutaric acids are presented as Hz normalized by the instrument's sensitivity to  
 63  $\text{F}_2^{34}\text{SO}_2$  since these organic acids were not calibrated. Red lines shown are linear fits to  
 64 the data.

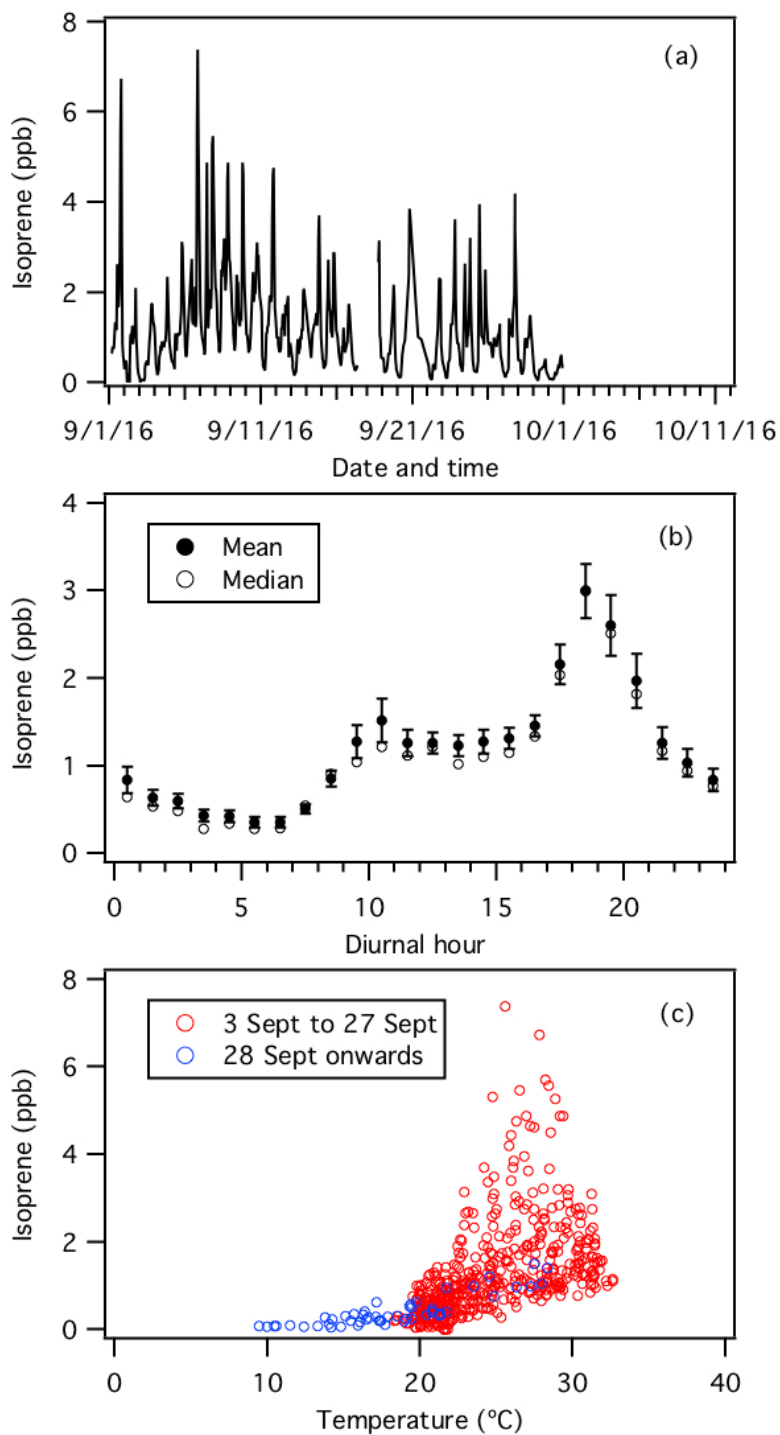

65

66 **Figure S9:** (a) Time series of isoprene concentration during the field study. (b) Diurnal  
 67 profile of isoprene. All the concentrations represent averages in 1-hour intervals and the  
 68 standard errors are plotted as error bars. (c) Scatter plot of isoprene concentration with  
 69 ambient temperature. All the data are displayed as 1-hour averages.

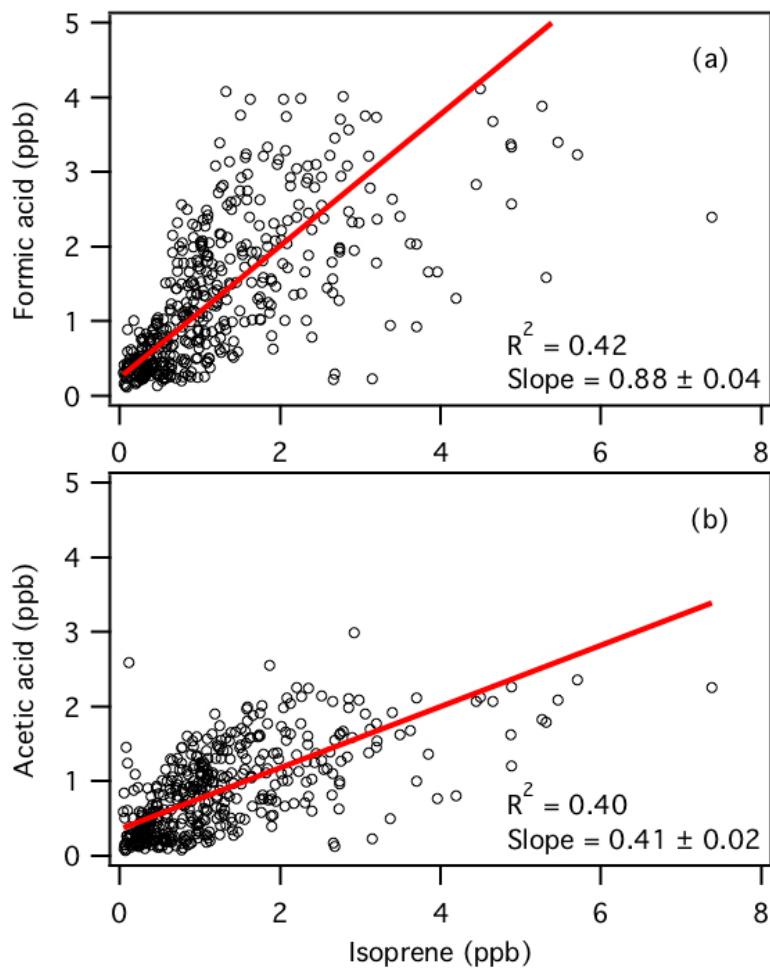

70

71 **Figure S10:** Scatter plots of concentrations of (a) formic and (b) acetic acids with  
72 isoprene concentration. All the data are displayed as 1-hour averages. Red lines shown  
73 are linear fits to the data.
